# Supplementary material
Source: HighWire-hosted journal article supplement (https://www.cmajopen.ca/highwire/filestream/89019/field_highwire_adjunct_files/3/open-2021-0159-gripp2.pdf)
Supplement: open-2021-0159-gripp2.pdf [file open-2021-0159-gripp2.pdf]

GRIPP2 short form Section and topic Item

|                                     |                                                                                                                                                       |                     |
|-------------------------------------|-------------------------------------------------------------------------------------------------------------------------------------------------------|---------------------|
| 1: Aim                              | Report the aim of PPI in the study                                                                                                                    | Reported on page 2  |
| 2: Methods                          | Provide a clear description of the methods used for PPI in the study                                                                                  | Reported on page 3  |
| 3: Study results                    | Outcomes—Report the results of PPI in the study, including both positive and negative outcomes                                                        | Reported on page 10 |
| 4: Discussion and conclusions       | Outcomes—Comment on the extent to which PPI influenced the study conclusions overall. Describe positive and negative effects                          | Reported on page 10 |
| 5: Reflections/critical perspective | Comment critically on the study, reflecting on the things that went well perspective and those that did not, so others can learn from this experience | Reported on page 10 |
